1 Development and validation of a length- and habitus-based method of total body weight  
2 estimation for critically ill adults requiring urgent weight-based medical intervention

3

4 <sup>1,2</sup>Mike Wells

5 <sup>2</sup>Lara Nicole Goldstein

6 <sup>3</sup>Giles Cattermole

7

8 <sup>1</sup>Department of Emergency Medicine and Critical Care, Herbert Wertheim College of Medicine,  
9 Florida International University, Miami, FL, USA

10

11 <sup>2</sup>Division of Emergency Medicine, Faculty of Health Sciences, University of the Witwatersrand,  
12 Johannesburg, South Africa

13

14 <sup>3</sup>Emergency Department, Princess Royal University Hospital, King's College Hospital NHS  
15 Trust, London, UK

16

17

18 Corresponding author: Professor M Wells [profmikewells@gmail.com](mailto:profmikewells@gmail.com) +1 (786) 389-0588  
19 Herbert Wertheim College of Medicine, Florida International  
20 University, 11200 SW 8th Street, Miami, FL 33199

21

22 Word count manuscript: 3032

23 Word count abstract: 235

24

25 **ABSTRACT**

26 **Background** Erroneous weight estimation during the management of emergency presentations  
27 in adults may contribute to patient harm and poor outcomes. Patients can often not be weighed  
28 during emergencies and a weight estimation is required to facilitate weight-based therapies.  
29 Many existing methods of weight estimation are either unacceptably inaccurate or very difficult  
30 to use during the provision of emergency care.

31 **Methods** The weight estimation system developed in this study was based on and modified  
32 from the PAWPER XL-MAC method, a paediatric weight estimation system that uses recumbent  
33 length and mid-arm circumference (MAC) to predict total body weight. This model was validated  
34 in the 2015 – 2018 National Health and Nutrition Examination Survey (NHANES) datasets. The  
35 primary outcome measure was to achieve >95% of estimations within 20% of measured weight  
36 (P20>95%).

37 **Results** The modified PAWPER XL-MAC model achieved a P20 of 96.0% and a P10 of 71.3%  
38 in the validation dataset (N=11520). This accuracy (P20>95%) was maintained in both sexes, all  
39 ages, all ethnic groups, all lengths and in all habitus-types, except for the subgroup of severely  
40 obese individuals.

41 **Conclusions** The modified PAWPER XL-MAC model proved to be a very accurate method of  
42 weight estimation. It is more accurate than most other published reports of existing methods of  
43 weight estimation, except for patients' own estimations. It therefore could have a role in  
44 facilitating emergency drug dose calculations, if prospective studies bear out the accuracy found  
45 in this study.

46

47 **INTRODUCTION**

48 There may be as much as a 250% increase in poor outcomes in stroke patients if their  
49 estimated weight, from which the dose of intravenous thrombolytics is calculated, differs from  
50 their actual total body weight by more than 10% [1]. This is important since as many as 85% of  
51 stroke patients may have thrombolytic doses calculated from estimated weights, when accurate  
52 measured weights cannot be obtained prior to initiating treatment [2, 3]. During medical  
53 emergencies it is frequently necessary to estimate weight to allow drug dose calculations, as  
54 obtaining a measured weight may not be possible or it may delay urgent treatment. If an  
55 estimated weight is inaccurate, it could give rise to critical medication dosing errors resulting in  
56 severe harm or even death [4]. The use of inaccurate methods of estimating weight, therefore,  
57 “cannot be considered to be good medical practice” [5]. Furthermore, it is essential that the  
58 weight estimation is as accurate as can be achieved without impacting negatively on  
59 resuscitative care by excessively consuming time or cognitive resources [6, 7]. This imperative  
60 for dosing accuracy applies not only to thrombolytic drugs, but many other emergently  
61 prescribed drugs including antimicrobials, anticoagulants, many cardiac medications,  
62 anticonvulsant, and antiepileptic medications [8].

63  
64 Weight estimation in adults has not been as widely studied as in children, in whom the dual  
65 length- and habitus-based methods (such as the PAWPER XL tape and the Mercy method)  
66 have been established to be the most accurate [9-11]. In adults, the most accurate weight  
67 estimations generally come from the patients themselves, but patients are often not able to  
68 provide an estimation of their own weight, and self-estimates by overweight and obese patients  
69 are frequently inaccurate [12]. Other existing methods of weight estimation have not been  
70 shown to be sufficiently accurate for safe drug dosing and may be too complex or time-  
71 consuming to use during emergency care [3, 13].

72  
73 Recently, attention has shifted to evaluating the best of the paediatric dual length- and habitus-  
74 based weight estimation systems in adults. The paediatric PAWPER XL-MAC method and the  
75 Mercy method have had a preliminary evaluation in adult populations, and outperformed other  
76 methods of weight estimation, except for patient self-estimations [14-16]. These methods have  
77 shown promise but would need to be modified and optimised for adults.

78

79 The selection of an important weight estimation method is important for both decision-makers  
80 and clinicians to develop appropriate policies and practices to ensure patient safety. Optimising  
81 dosing for weight-based drugs would maximise efficacy and minimise adverse effects

82  
83 We hypothesized that the PAWPER XL-MAC method could be adapted for use in adults, to  
84 produce an accurate, easy-to-use weight estimation system. The aim of this study was,  
85 therefore, to develop and validate an adult version of the PAWPER XL-MAC tape, using  
86 recumbent length and mid-arm circumference (MAC) to predict total body weight.

87

## 88 **METHODS**

89 This adult weight estimation model was based on the PAWPER XL-MAC tape paediatric weight  
90 estimation system [17]. The process used for developing, calibrating, and validating the new  
91 model is described below, with an overview in Figure 1.

92

### 93 **Method development**

94 The PAWPER XL-MAC tape is used as follows: firstly, the tape is held alongside the patient,  
95 and the patient's length measured from head to heel. The point where the patient's heel crosses  
96 the tape is noted – this is the length-segment that provides the relevant weight-data. Secondly,  
97 MAC is measured from the patient's non-dominant arm (ideally), using the scale on the  
98 PAWPER XL-MAC tape. From this measurement, the patient's habitus score (HS) can be  
99 determined, and their predicted weight read directly off the tape. Each length-segment on the  
100 tape has MAC ranges to define each habitus score category. The habitus score categories  
101 range from HS1 to HS7, with HS1 representing a very underweight patient, HS3 a normal  
102 weight patient and HS7 a severely obese patient. The other habitus scores represent  
103 intermediate body types.

104

105 The existing length-segments, MAC cutpoint values and HS categories of the original paediatric  
106 PAWPER XL-MAC tape were used for the new provisional model. New length-segments were  
107 added to extend the length of the tape from 1800 mm to 2000 mm. The MAC cutpoints and  
108 predicted weights for these segments were extrapolated from data in the “shorter” segments.  
109 The model was then coded into an electronic worksheet (Microsoft Excel for Mac, 2020) and  
110 underwent a first stage of evaluation. The coding generated a weight estimation (kg) with an  
111 input of height (cm) and MAC (mm).

112

## 113 **Datasets**

114 The National Health and Nutrition Examination Survey (NHANES) datasets from the 1999-2000  
115 to the 2017-2018 surveys were downloaded from the Centers for Disease Control (CDC)  
116 website [18]. The downloaded data included the following variables: sequence number, sex,  
117 race, age, total body weight (TBW), height, body mass index (BMI) and MAC. Data from  
118 children under the age of 16 years was excluded, as were all individuals with incomplete data.  
119 The datasets were pooled as follows: the initial model testing was done in the NHANES 2011-  
120 2012 and 2013-2014 surveys, the model calibration was done in the NHANES 1999-2000,  
121 2001-2002, 2003-2004, 2005-2006, 2007-2008, 2009-2010, 2011-2012 and 2013-2014 surveys,  
122 and the model validation was done in the 2015-2016 and 2017-2018 survey datasets.

123

## 124 **Initial model testing**

125 The initial model was used to generate estimates of weight from height and MAC for each  
126 individual in the dataset. The data was then analysed separately for each length-segment of the  
127 tape (e.g., the 180.1 to 183.0 cm length segment). The specific outcomes that were then  
128 evaluated were: mean percentage error (MPE), which represented the estimation bias; the root  
129 mean square percentage error (RMSPE) which quantified the estimation precision; and the  
130 percentage of weight estimations that fell within 10% (P10) as well as within 20% (P20) of  
131 measured weight, which denoted overall accuracy.

132

133 After the initial testing it was apparent that the following changes needed to be made to the  
134 original model: males and females needed to be evaluated separately; two additional habitus  
135 score categories were added to accommodate weight estimations in severely obese adults; and  
136 the length-segments needed to be reduced in size. This new model was then calibrated in a  
137 larger pooled dataset.

138

## 139 **Model calibration**

140 Weight estimates generated in the calibration dataset by the refined model were again  
141 examined in each length-segment of the tape. The MAC cutpoint values and predicted weights  
142 for each habitus score were adjusted until a target P20 >95% and P10 >70% was obtained for  
143 each habitus score category in each length-segment (based on previously suggested  
144 acceptable accuracy targets) [11]. At the upper limits of BMI there was a substantially reduced  
145 ability of MAC to discriminate between BMI categories. This suggested a biological limitation of  
146 using this single variable for further refinement of the model in these categories. The final

147 model, shown in Table 1, was finally subjected to formal validation using unused data from the  
148 most recent NHANES surveys datasets.

149

### 150 **Model validation**

151 The final model was validated by generating estimated weights in the pooled unused 2015-2016  
152 and 2017-2018 NHANES survey datasets. The performance of the model was evaluated by  
153 comparing the estimated weights against actual measured weight using the MPE, RMSPE, P10  
154 and P20. Subgroup analyses by sex, age, race (as defined in the NHANES datasets) and  
155 weight-status (determined by the CDC definitions of BMI as underweight, normal weight,  
156 overweight, obese, and severely obese) were performed. A Bland & Altman analysis was  
157 performed and graphically represented by subgroups of weight-status [19]. During the model  
158 development and analysis, the association between BMI and MAC was observed to be  
159 substantially weaker in severely obese patients than in thinner patients. For this reason, a  
160 correlation analysis between BMI and MAC was performed in these subgroups to evaluate and  
161 quantify this difference in the relationship.

162

163 All data was analysed using Microsoft Excel (Microsoft, Redmond, Washington: Microsoft, 2016)  
164 and Stata Statistical Software (StataCorp. 2019. Stata Statistical Software: Release 16. College  
165 Station, TX: StataCorp LLC). A significance level of 0.05 was used for all analyses.

166

### 167 **Outcome measures**

168 The primary outcome measure was the performance of the model when compared to measured  
169 TBW. A P20 >95% and a P10 >70% was considered to be an acceptable accuracy of  
170 estimation, as has previously been suggested [11, 20]. This benchmark is regularly achieved in  
171 children by the paediatric dual length-based, habitus-modified weight-estimation systems.

172

## 173 **RESULTS**

### 174 **Characteristics of study participants**

175 The demographic details and characteristics of the participants included in the calibration and  
176 validation studies are shown in Table 2. There were 46340 adults included in the initial  
177 calibration study and 11520 in the validation study. Interestingly, there were some important  
178 differences between the pooled older derivation datasets (1999 to 2014) and the most recent  
179 pooled validation datasets (2015 to 2018). The validation dataset was significantly older and  
180 heavier (t-test  $p < 0.0001$  for each), with a lower proportion of normal weight individuals and a

181 higher proportion of obese and especially severely obese individuals (Chi-squared test,  
182  $p < 0.0001$ ). There was also a significant difference in the ethnic distribution, with a higher  
183 proportion of Mexican Americans and lower proportion of Non-Hispanic Whites in the validation  
184 dataset (Chi-squared test,  $p < 0.0001$ ).

185

#### 186 **Validation of the modified PAWPER XL-MAC method**

187 The modified PAWPER XL-MAC method exceeded the predefined acceptable outcome criteria  
188 in the validation dataset overall, and in every segment-by-segment analysis. Analysis by sex  
189 showed virtually identical results in both the calibration and validation datasets (see Table 3).  
190 Subgroup analyses by age, BMI, and race (ethnicity) are also shown in Table 3. The primary  
191 accuracy outcome was achieved in all subgroups except extremes of habitus (severely obese  
192 adults). When controlled for the prevalence of severe obesity, adults over the age of 80 years  
193 also achieved the primary accuracy outcome.

194

195 The Bland & Altman plots of the pooled NHANES validation datasets, as well as for subgroups  
196 representing extremes of habitus, are shown in Figure 2.

197

## 198 **DISCUSSION**

### 199 **Importance of and need for accurate weight estimation**

200 Several major patient safety organisations have determined that incorrect estimation of weight is  
201 one of the key causes of medication errors [21, 22]. Approximately 65% to 75% of weight  
202 estimation errors reach the patient in terms of dose errors, and patient harm can be identified in  
203 between 1% and 10% of these incidents [21, 22]. Therefore, this is an important issue. An  
204 accurate weight is important for weight-based dosing for many emergency, critical care and  
205 cardiac drugs [22]. Given that patients' weight often cannot be measured during emergencies  
206 [3], that patients are frequently unable to provide an estimate of their own weight [23], and that  
207 the consequences of inaccurate weight estimation could be catastrophic, it is essential to  
208 always have access to an accurate and easy-to-use weight estimation method [1, 12, 24]. The  
209 accuracy of the weight estimate (and therefore the dose) will determine whether the drug will  
210 produce optimal effectiveness (correct dose), toxic effects, possibly including death (overdose),  
211 or insufficient or no effects at all (underdose) [8]. The need for accurate weight estimation is  
212 therefore not uncommon and is relevant for medical practice in multiple disciplines and multiple  
213 locations: the pre-hospital environment, the Emergency Department, the Intensive Care Unit,  
214 the Operating Room and even the general ward.

215

## 216 **Findings in this study**

217 In this study, the modified PAWPER XL-MAC model satisfied the primary outcome measures by  
218 achieving a P20 in >95% of adults (equivalent to a critical error rate of <5%). The findings were  
219 consistent across all lengths, both sexes, all ages, all ethnic groups and in all habitus-types  
220 except in severely obese adults (who accounted for approximately 5% of the validation study  
221 sample).

222

223 Height and MAC proved again to be highly predictive for weight estimation, and other studies in  
224 both adults and children have shown the value of this combination to predict weight [15, 17, 25].  
225 MAC has a strong evidence-base supporting its value as a surrogate for body habitus and has  
226 been repeatedly shown to be the single anthropometric variable most predictive of body weight,  
227 other than height [26]. Furthermore, both height and MAC are reliable, easy-to-perform  
228 measurements with a high inter-user agreement [27, 28].

229

## 230 **Existing methods of estimating weight in adults**

231 Weight estimation in adults has not been well studied previously, and the methodology and  
232 quality of the existing studies has frequently been poor. Nonetheless, a number of different  
233 methods of weight estimation have been studied in adults (see Table 4). In general, patient self-  
234 estimates have proven to be the most accurate, with accuracy of between 80 and 100% of  
235 estimations within 20% of measured weight [14, 15, 29]. However, patients are often not able to  
236 provide an estimation of their weight, with some studies reporting in excess of 80% of patients  
237 falling into this category [2]. In addition, there is a large variation in findings between studies,  
238 with some showing excellent self-estimations and others dismal results [30, 31]. Much of the  
239 accuracy reported in studies is dependent on the number of obese and severely obese patients  
240 in the sample, as self-estimations by these patients are often poor [31]. Nonetheless, this  
241 method remains the method of choice in *compos mentis* patients who are confident that they  
242 can provide a weight estimate.

243

244 Guesses of weight by relatives and healthcare providers are often very inaccurate, with critical  
245 error rates of >40% [32-34]. Although some studies have shown reasonable accuracy, this is  
246 inconsistent and often when study populations are comprised mostly of normal weight patients  
247 weighing less than 100kg [35]. Similarly, univariate anthropometric formulas have generally not  
248 proven to achieve satisfactory accuracy, although MAC has shown reasonable weight



249 estimation performance (with a P20 of 90%) in one previous study [26, 36-38]. Multivariate  
250 anthropometric formulas have shown some promise in initial studies, only to disappoint in  
251 subsequent attempts at validation [12, 13, 37, 39]. The best of these formulas, the Lorenz  
252 formula, achieved a P20 of >95% in the initial study, a P20 of only 85% in a subsequent  
253 validation study, but then an excellent accuracy in a recent virtual study [12, 13, 16].  
254 Furthermore, multiple anthropometric measurements might be difficult to acquire in  
255 emergencies, and these formulas involve complex equations which might be difficult to use and  
256 vulnerable to error, as has been seen in paediatric studies [40, 41].

257

### 258 **The new PAWPER XL-MAC adult model vs existing methods of weight estimation**

259 The performance of the modified PAWPER XL-MAC system developed in this study compared  
260 favourably with the accuracy of other previously published methods (see Table 4 for the details).  
261 This comparison was hindered by the difference in proportion of obese adults in the current  
262 study sample and that of previously published studies. The very high proportion of severely  
263 obese adults was unique amongst weight estimation studies, including one evaluating weight  
264 estimation in obese patients [39]. Nonetheless, with the increasing prevalence of severe obesity  
265 in many global populations, studies (and appropriate methodologies) are needed to optimise  
266 weight estimation strategies in this subgroup of patients [42]. Despite this potential bias, the  
267 adult PAWPER XL-MAC system was better than most other systems, with only patient self-  
268 estimates more accurate.

269

### 270 **The role of weight estimation during time-critical emergency care**

271 Whenever possible, even in emergencies, an accurate measured weight should be obtained as  
272 soon as is practically possible [43]. The weighing process, however, might be difficult and very  
273 time-consuming in non-ambulant patients and, for example, in stroke patients who are  
274 candidates for thrombolysis the use of sling-scales may delay door-to-needle time [44]. In-bed  
275 scales are far from universally accessible and cannot always be used even if they are available.  
276 Interestingly, there are almost no studies validating the accuracy of in-bed scales and none that  
277 we could find relating to emergency care. The limited data available suggests that their use can  
278 be associated with large and clinically significant errors [45, 46].

279

280 Few of the existing weight estimation methods for adults were designed for emergency use,  
281 which is why a system that has been specifically designed for this purpose would be desirable  
282 even in the best equipped environments. Two main factors characterise emergency weight

283 estimation systems: accuracy and usability. Accuracy is important because, as Orlando and  
284 colleagues stated: “Estimates that deviate >10% from actual weight could make treatment itself  
285 life threatening” [34]. In addition to accuracy, usability is also important in a weight estimation  
286 system – it must not require a substantial amount of training to learn, and must be quick and  
287 easy to use, as weight estimation itself can lead to delays in emergency treatment [44]. The  
288 PAWPER XL and PAWPER XL-MAC systems were designed for emergency use, and data from  
289 paediatric studies suggested that they fulfil the accuracy and usability criteria and are relatively  
290 less impacted by human factor errors than other weight estimation systems [27, 47, 48]. This  
291 needs to be established in prospective studies of emergency care in adult patients, however.

292

### 293 **Limitations**

294 The main limitation of this study was that measurement of length and MAC in a supine adult  
295 receiving emergency care by a stressed healthcare provider might not be as accurate as that  
296 performed in a cooperative adult by an expert in anthropometry. The effects of human factor  
297 errors require evaluation in real-world or simulation situations in future studies. The other major  
298 limitation of the study was that the development of this system was from data from the USA  
299 only. This means that it might not be representative of any other population, especially  
300 populations from low- and middle-income countries. This system would need to be evaluated in  
301 a range of populations to establish its accuracy in each.

302

### 303 **Conclusions**

304 The consistent level of high accuracy achieved by the modified PAWPER XL-MAC method  
305 across a large sample of adults exceeded the pre-determined outcome measures. Weight  
306 estimates were accurate in adults of both sexes, all lengths, all ethnic groups, all ages, and all  
307 habitus-types, except for severely obese adults ( $BMI \geq 40 \text{ kg.m}^{-2}$ ). It is possible that severely  
308 obese adults will remain a challenge for accurate weight estimation and appropriate drug dose  
309 determination. The PAWPER XL-MAC for adults shows promise for being used to aid in guiding  
310 dosing for drugs with narrow therapeutic windows when weight cannot be measured, or when  
311 measuring weight would be excessively time-consuming. The experience with the PAWPER XL-  
312 MAC tape in children, with its high degree of accuracy and ease-of-use, suggests that it might  
313 be resilient to use during emergencies in adults as well. Future prospective studies in diverse  
314 populations will be required to establish the accuracy and ease-of-use of the PAWPER XL-MAC  
315 tape system to confirm the findings of this study.

316

317 **Conflicts of interest**

318 The authors declare that they have no financial conflicts of interest

319

320 **Acknowledgements**

321 None

322

323 **REFERENCES**

- 324 [1] Paliwal PR, Sharma AK, Komal Kumar RN, Wong LYH, Chan BPL, Teoh HL, et al.  
325 Effect of erroneous body-weight estimation on outcome of thrombolysed stroke patients.  
326 J Thromb Thrombolysis. 2020;50(4):921-928. 10.1007/s11239-020-02118-3
- 327 [2] Diedler J, Ahmed N, Glahn J, Grond M, Lorenzano S, Brozman M, et al. Is the maximum  
328 dose of 90 mg alteplase sufficient for patients with ischemic stroke weighing >100 kg?  
329 Stroke. 2011;42(6):1615-20. 10.1161/STROKEAHA.110.603514
- 330 [3] van de Stadt SI, van Schaik SM, van den Berg-Vos RM. [Estimating weight accurately  
331 for safe treatment: body weight estimation in patients with acute ischaemic stroke is  
332 frequently inaccurate]. Ned Tijdschr Geneesk. 2015;159:A8909.
- 333 [4] The Joint Commission. A Best Practice in Kilograms 2020 [Accessed 2021/1/15].  
334 Available from: [https://www.jointcommission.org/resources/news-and-](https://www.jointcommission.org/resources/news-and-multimedia/blogs/dateline-tjc/2020/06/17/a-best-practice-in-kilograms/)  
335 [multimedia/blogs/dateline-tjc/2020/06/17/a-best-practice-in-kilograms/](https://www.jointcommission.org/resources/news-and-multimedia/blogs/dateline-tjc/2020/06/17/a-best-practice-in-kilograms/)
- 336 [5] Luscombe M, Owens B. Weight estimation in resuscitation: is the current formula still  
337 valid? Arch Dis Child. 2007;92(5):412-415. <http://dx.doi.org/10.1136/adc.2006.107284>
- 338 [6] National Coordinating Council for Medication Error Reporting and Prevention.  
339 Recommendations to weigh patients and document metric weights to ensure accurate  
340 medication dosing 2018 [Accessed 2021/01/15]. Available from:  
341 [https://www.nccmerp.org/recommendations-weigh-patients-and-document-metric-](https://www.nccmerp.org/recommendations-weigh-patients-and-document-metric-weights-ensure-accurate-medication-dosing-adopted)  
342 [weights-ensure-accurate-medication-dosing-adopted](https://www.nccmerp.org/recommendations-weigh-patients-and-document-metric-weights-ensure-accurate-medication-dosing-adopted)
- 343 [7] Wells M, Kramer E. Optimizing emergency drug dosing in children. Acad Emerg Med.  
344 2008;15(12):1325.
- 345 [8] Tyson RJ, Park CC, Powell JR, Patterson JH, Weiner D, Watkins PB, et al. Precision  
346 Dosing Priority Criteria: Drug, Disease, and Patient Population Variables. Front  
347 Pharmacol. 2020;11:420. 10.3389/fphar.2020.00420

- 348 [9] Young KD, Korotzer NC. Weight estimation methods in children: a systematic review.  
349 Ann Emerg Med. 2016;68(4):441-451 e10. 10.1016/j.annemergmed.2016.02.043
- 350 [10] Wells M, Goldstein LN, Bentley A. A systematic review and meta-analysis of the  
351 accuracy of weight estimation systems used in paediatric emergency care in developing  
352 countries. Afr J Emerg Med. 2017;7:S36-S54. 10.1016/j.afjem.2017.06.001
- 353 [11] Wells M, Goldstein LN, Bentley A. The accuracy of emergency weight estimation  
354 systems in children - a systematic review and meta-analysis. Int J Emerg Med.  
355 2017;10(29):1-43. 10.1186/s12245-017-0156-5
- 356 [12] Darnis S, Fareau N, Corallo CE, Poole S, Dooley MJ, Cheng AC. Estimation of body  
357 weight in hospitalized patients. QJM. 2012;105(8):769-74. 10.1093/qjmed/hcs060
- 358 [13] Lorenz MW, Graf M, Henke C, Hermans M, Ziemann U, Sitzler M, et al. Anthropometric  
359 approximation of body weight in unresponsive stroke patients. J Neurol Neurosurg  
360 Psychiatry. 2007;78(12):1331-6. 10.1136/jnnp.2007.117150
- 361 [14] Akinola O, Wells M, Parris P, Goldstein LN. Are adults just big kids? Can the newer  
362 paediatric weight estimation systems be used in adults? S Afr Med J. 2021;111(2):166-  
363 170. 10.7196/SAMJ.2021.v111i2.15061
- 364 [15] Cattermole GN, Manirafasha A. Accuracy of weight estimation methods in adults,  
365 adolescents and children: a prospective study. Emerg Med J. 2020. 10.1136/emered-  
366 2020-209581
- 367 [16] Cattermole GN, Wells M. Comparison of adult weight estimation methods for use during  
368 emergency medical care. J Am Coll Emerg Physicians Open. 2021;2(4):e12515.  
369 10.1002/emp2.12515
- 370 [17] Wells M, Goldstein LN, Bentley A. Development and validation of a method to estimate  
371 bodyweight in critically ill children using length and mid-arm circumference  
372 measurements - the PAWPER XL-MAC system. S Afr Med J. 2017;107(11):1015-1021.  
373 10.7196/SAMJ.2017.v107i11.12505

- 374 [18] National Health and Nutrition Examination Survey Data. 2016. Available from:  
375 <https://www.cdc.gov/nchs/nhanes/continuousnhanes/default.aspx>.
- 376 [19] Bland J, Altman D. Statistical methods for assessing agreement between two methods  
377 of clinical assessment. *Lancet*. 1986;1(8476):307-310.
- 378 [20] Stewart D. Accuracy of the Broselow tape for estimating paediatric weight in two  
379 Australian Emergency Departments: University of Sydney; 2009 [Accessed 7 February  
380 2020, Master of Biostatistics]. Available from:  
381 [https://ses.library.usyd.edu.au/bitstream/2123/6265/1/Declan%20Stewart%20WPP%20f](https://ses.library.usyd.edu.au/bitstream/2123/6265/1/Declan%20Stewart%20WPP%20final.pdf)  
382 [inal.pdf](https://ses.library.usyd.edu.au/bitstream/2123/6265/1/Declan%20Stewart%20WPP%20final.pdf)
- 383 [21] Bailey B, Gaunt M, Grissinger M. Update on medication errors associated with incorrect  
384 patient weights. *Pa Patient Saf Advis*. 2016;13(2):50-57.
- 385 [22] ECRI Institute. Medication safety- inaccurate patient weight can cause dosing errors.  
386 *PSO Navigator*. 2014;6(1):1-11.
- 387 [23] Cassier-Woidasky A. To weigh or to estimate for exact dosage of thrombolysis – ways to  
388 get the body-weight in German stroke units. *Akt Neurol*. 2015;42:205-211.
- 389 [24] Dancsecs KA, Nestor M, Bailey A, Hess E, Metts E, Cook AM. Identifying errors and  
390 safety considerations in patients undergoing thrombolysis for acute ischemic stroke. *Am*  
391 *J Emerg Med*. 2021;47:90-94. 10.1016/j.ajem.2021.03.043
- 392 [25] Abdel-Rahman SM, Ridge AL. An improved pediatric weight estimation strategy. *Open*  
393 *Med Dev J*. 2012;4:87-97. 10.2174/1875181401204010087
- 394 [26] Cattermole GN, Graham CA, Rainer TH. Mid-arm circumference can be used to  
395 estimate weight of adult and adolescent patients. *Emerg Med J*. 2017;34(4):231-236.  
396 10.1136/emered-2015-205623
- 397 [27] Wells M, Goldstein LN. Human factor errors in the use of the PAWPER Tape systems:  
398 an analysis of inter-rater reliability. *Cureus*. 2021;13(1):e12468. 10.7759/cureus.12468

- 399 [28] WHO Multicentre Growth Reference Study Group. Reliability of anthropometric  
400 measurements in the WHO Multicentre Growth Reference Study. *Acta Paediatr.*  
401 2006;450(Suppl):38-46. 10.1111/j.1651-2227.2006.tb02374.x
- 402 [29] Maukonen M, Mannisto S, Tolonen H. A comparison of measured versus self-reported  
403 anthropometrics for assessing obesity in adults- a literature review. *Scand J Public*  
404 *Health.* 2018;46:565-579.
- 405 [30] Lin BW, Yoshida D, Quinn J, Strehlow M. A better way to estimate adult patients'  
406 weights. *Am J Emerg Med.* 2009;27(9):1060-4. 10.1016/j.ajem.2008.08.018
- 407 [31] Hernandez-Barrera L, Trejo Valdivia B, Tellez-Rojo MM, Barquera S, Munoz-Manrique  
408 C. Validity assessment of self-reported weight and its correction process among  
409 Mexican adult women of reproductive age. *PLoS One.* 2020;15(7):e0235967.  
410 10.1371/journal.pone.0235967
- 411 [32] Barrow T, Khan MS, Halse O, Bentley P, Sharma P. Estimating weight of patients with  
412 acute stroke when dosing for thrombolysis. *Stroke.* 2016;47(1):228-31.  
413 10.1161/STROKEAHA.115.011436
- 414 [33] Boehringer B, Pfohl B, Tilney PVR. Accuracy of critical care transport team estimation of  
415 patient height and weight in scene responses. *Air Med J.* 2020;39(4):262-264.  
416 10.1016/j.amj.2020.04.010
- 417 [34] Orlando J, LaBond VA. Step right up! Healthcare provider weight estimation vs. a  
418 professional weight guesser. *Am J Emerg Med.* 2019;37(2):356-357.  
419 10.1016/j.ajem.2018.06.014
- 420 [35] Gill D, Halsey L, Kalkat H, Patel S, Kar A. Estimated weight is not a reliable measure for  
421 dosing tissue plasminogen activator for thrombolysis in acute ischaemic stroke. *Int J*  
422 *Stroke.* 2016;11(2):NP25-6. 10.1177/1747493015616641

- 423 [36] Weber-Sanchez A, Velazquez OS, Weber-Alvarez P. Validation of the Broca index as  
424 the most practical method to calculate the ideal body weight. *Journal of Clinical*  
425 *Investigation and Studies*. 2018;1(1). 10.15761/jcis.1000105
- 426 [37] Kokong DD, Pam IC, Zoakah AI, Danbauchi SS, Mador ES, Mandong BM. Estimation of  
427 weight in adults from height: a novel option for a quick bedside technique. *Int J Emerg*  
428 *Med*. 2018;11(1):54. 10.1186/s12245-018-0212-9
- 429 [38] Opdam MH, Koekkoek K, Boeije T, Mullaart N, van Zanten ARH. Mid-arm circumference  
430 method is invalid to estimate the body weight of elderly Emergency Department patients  
431 in the Netherlands. *Medicine (Baltimore)*. 2019;98(32):e16722.  
432 10.1097/MD.00000000000016722
- 433 [39] Crandall CS, Gardner S, Braude DA. Estimation of total body weight in obese patients.  
434 *Air Med J*. 2009;28(3):139-145. 10.1016/j.amj.2009.02.002
- 435 [40] Bonadio W. Frequency of emergency medicine resident dosing miscalculations treating  
436 pediatric patients. *Am J Emerg Med*. 2019. 10.1016/j.ajem.2019.03.027
- 437 [41] Marikar D, Varshneya K, Wahid A, Apakama O. Just too many things to remember? A  
438 survey of paediatric trainees' recall of Advanced Paediatric Life Support (APLS) weight  
439 estimation formulae. *Arch Dis Child*. 2013;98(11):921. 10.1136/archdischild-2013-  
440 304360
- 441 [42] Wells M, Goldstein LN. Optimising emergency weight estimation in underweight and  
442 obese children: the accuracy of estimations of total body weight and ideal body weight.  
443 *Eur J Emerg Med*. 2019;26(4):301-307. 10.1097/MEJ.0000000000000561
- 444 [43] Pennsylvania Patient Safety Authority. Medication errors- significance of accurate  
445 patient weights. *Pa Patient Saf Advis*. 2009;6(1):10-16.
- 446 [44] Truc My Nguyen T, van de Stadt SI, Groot AE, Wermer MJ, den Hertog HM, Droste HM,  
447 et al. Thrombolysis related symptomatic intracranial hemorrhage in estimated versus  
448 measured body weight. *Int J Stroke*. 2020;15(2):159-166. 10.1177/1747493019851285



- 449 [45] Freitag E, Edgecombe G, Baldwin I, Cottier B, Heland M. Determination of body weight  
450 and height measurement for critically ill patients admitted to the intensive care unit: A  
451 quality improvement project. *Aust Crit Care*. 2010;23(4):197-207.  
452 10.1016/j.aucc.2010.04.003
- 453 [46] Gerl H, Miko A, Nelson M, Godaire L. Are in-bed electronic weights recorded in the  
454 medical record accurate? *Medsurg Nurs*. 2016;25(3):177-201.
- 455 [47] Wells M, Goldstein LN, Bentley A. The accuracy of paediatric weight estimation during  
456 simulated emergencies: the effects of patient position, patient cooperation and human  
457 errors. *Afr J Emerg Med*. 2018;8(2):43-50. 10.1016/j.afjem.2017.12.003
- 458 [48] Wells M, Goldstein LN. How and why paediatric weight estimation systems fail - a body  
459 composition study. *Cureus*. 2020;12(3):e7198. 10.7759/cureus.7198
- 460
- 461

462 **Legends to figures**

463 **Figure 1** The methodology followed in this study. MAC = mid-arm circumference, BMI = body  
464 mass index, CDC = Centers for Disease Control and Prevention, HS = habitus score, NHANES  
465 = national health and nutrition examination survey, P10 = percentage of weight estimations  
466 within 10% of actual weight, P20 = percentage of weight estimations within 20% of actual  
467 weight,

468  
469 **Figure 2** Bland & Altman diagram by subgroups of weight status. The x-axis represents an  
470 individual's actual weight; the y-axis represents the percentage error of the difference between  
471 estimated and actual weight ( $100 \times [\text{estimated weight} - \text{actual weight}] / \text{actual weight}$ ). A negative  
472 value thus indicates an underestimation of weight. The red dashed lines represent the 95%  
473 limits of agreement of these residuals. The different colour markers represent individuals with  
474 different weight status, as shown in the key. The relationship between MAC and BMI was  
475 disrupted in patients with very high BMI, which lead to poorer weight predictions in these  
476 patients. A Pearson's correlation analysis between BMI and MAC showed an  $r^2$  of 0.72 (0.71,  
477 0.73) for patients with a BMI < 40 kg.m<sup>-2</sup> and an  $r^2$  of 0.29 (0.27, 0.31) for patients with a BMI ≥ 40  
478 kg.m<sup>-2</sup>.

479

480 **Ethics statement**

481 Ethical approval was not required for this study, as no patient participants were included. The  
482 data was obtained from the CDC's online open access databases, which are completely  
483 anonymised.

| <b>MALES</b><br>Length<br>(cm) | <b>HS1</b>         |                          | <b>HS2</b>         |                          | <b>HS3</b>         |                          | <b>HS4</b>         |                          | <b>HS5</b>         |                          | <b>HS6</b>         |                          | <b>HS7</b>         |                          | <b>HS8</b>         |                          | <b>HS9</b>         |                          |
|--------------------------------|--------------------|--------------------------|--------------------|--------------------------|--------------------|--------------------------|--------------------|--------------------------|--------------------|--------------------------|--------------------|--------------------------|--------------------|--------------------------|--------------------|--------------------------|--------------------|--------------------------|
|                                | <b>TBW</b><br>(kg) | <b>MAC range</b><br>(mm) | <b>TBW</b><br>(kg) | <b>MAC range</b><br>(mm) | <b>TBW</b><br>(kg) | <b>MAC range</b><br>(mm) | <b>TBW</b><br>(kg) | <b>MAC range</b><br>(mm) | <b>TBW</b><br>(kg) | <b>MAC range</b><br>(mm) | <b>TBW</b><br>(kg) | <b>MAC range</b><br>(mm) | <b>TBW</b><br>(kg) | <b>MAC range</b><br>(mm) | <b>TBW</b><br>(kg) | <b>MAC range</b><br>(mm) | <b>TBW</b><br>(kg) | <b>MAC range</b><br>(mm) |
| ≤153.0                         | <b>39</b>          | ≤232                     | <b>45</b>          | 233 to 258               | <b>55</b>          | 259 to 292               | <b>62</b>          | 293 to 330               | <b>71</b>          | 331 to 347               | <b>80</b>          | 348 to 354               | <b>90</b>          | 355 to 364               | <b>98</b>          | 365 to 384               | <b>108</b>         | ≥385                     |
| 153.1 to 158.0                 | <b>42</b>          | ≤236                     | <b>48</b>          | 237 to 257               | <b>57</b>          | 258 to 292               | <b>66</b>          | 293 to 343               | <b>78</b>          | 344 to 366               | <b>88</b>          | 367 to 396               | <b>100</b>         | 397 to 410               | <b>110</b>         | 411 to 420               | <b>120</b>         | ≥421                     |
| 158.1 to 162.0                 | <b>44</b>          | ≤228                     | <b>53</b>          | 229 to 269               | <b>61</b>          | 270 to 297               | <b>69</b>          | 298 to 327               | <b>79</b>          | 328 to 370               | <b>90</b>          | 371 to 392               | <b>102</b>         | 393 to 417               | <b>115</b>         | 418 to 429               | <b>125</b>         | ≥430                     |
| 162.1 to 165.0                 | <b>47</b>          | ≤234                     | <b>54</b>          | 235 to 268               | <b>62</b>          | 269 to 300               | <b>73</b>          | 301 to 344               | <b>85</b>          | 345 to 375               | <b>95</b>          | 376 to 390               | <b>105</b>         | 391 to 433               | <b>120</b>         | 434 to 470               | <b>135</b>         | ≥471                     |
| 165.1 to 168.0                 | <b>49</b>          | ≤246                     | <b>58</b>          | 247 to 276               | <b>66</b>          | 277 to 307               | <b>76</b>          | 308 to 352               | <b>89</b>          | 353 to 379               | <b>99</b>          | 380 to 392               | <b>108</b>         | 393 to 419               | <b>125</b>         | 420 to 466               | <b>140</b>         | ≥467                     |
| 168.1 to 171.0                 | <b>52</b>          | ≤236                     | <b>59</b>          | 237 to 277               | <b>67</b>          | 278 to 304               | <b>77</b>          | 305 to 347               | <b>90</b>          | 348 to 379               | <b>100</b>         | 380 to 405               | <b>113</b>         | 406 to 434               | <b>131</b>         | 435 to 480               | <b>155</b>         | ≥481                     |
| 171.1 to 174.0                 | <b>54</b>          | ≤243                     | <b>60</b>          | 244 to 280               | <b>70</b>          | 281 to 312               | <b>80</b>          | 313 to 345               | <b>92</b>          | 346 to 382               | <b>105</b>         | 383 to 416               | <b>115</b>         | 417 to 446               | <b>135</b>         | 447 to 481               | <b>158</b>         | ≥482                     |
| 174.1 to 177.0                 | <b>55</b>          | ≤248                     | <b>63</b>          | 249 to 281               | <b>72</b>          | 282 to 315               | <b>84</b>          | 316 to 355               | <b>96</b>          | 356 to 382               | <b>106</b>         | 383 to 411               | <b>120</b>         | 412 to 437               | <b>140</b>         | 438 to 464               | <b>160</b>         | ≥465                     |
| 177.1 to 180.0                 | <b>58</b>          | ≤255                     | <b>65</b>          | 256 to 286               | <b>76</b>          | 287 to 324               | <b>88</b>          | 325 to 360               | <b>101</b>         | 361 to 400               | <b>115</b>         | 401 to 419               | <b>130</b>         | 420 to 478               | <b>148</b>         | 479 to 497               | <b>164</b>         | ≥498                     |
| 180.1 to 183.0                 | <b>59</b>          | ≤256                     | <b>67</b>          | 257 to 285               | <b>77</b>          | 286 to 324               | <b>91</b>          | 325 to 364               | <b>105</b>         | 365 to 392               | <b>118</b>         | 393 to 431               | <b>135</b>         | 432 to 477               | <b>152</b>         | 478 to 525               | <b>170</b>         | ≥526                     |
| 183.1 to 186.0                 | <b>60</b>          | ≤251                     | <b>67</b>          | 252 to 282               | <b>79</b>          | 283 to 324               | <b>91</b>          | 325 to 362               | <b>108</b>         | 363 to 411               | <b>125</b>         | 412 to 438               | <b>142</b>         | 439 to 461               | <b>155</b>         | 462 to 489               | <b>175</b>         | ≥490                     |
| 186.1 to 189.0                 | <b>62</b>          | ≤263                     | <b>72</b>          | 264 to 294               | <b>84</b>          | 295 to 333               | <b>98</b>          | 334 to 369               | <b>111</b>         | 370 to 409               | <b>127</b>         | 410 to 442               | <b>144</b>         | 443 to 469               | <b>158</b>         | 470 to 502               | <b>180</b>         | ≥503                     |
| 189.1 to 192.0                 | <b>67</b>          | ≤267                     | <b>74</b>          | 268 to 288               | <b>86</b>          | 289 to 330               | <b>100</b>         | 331 to 366               | <b>113</b>         | 367 to 416               | <b>132</b>         | 417 to 434               | <b>144</b>         | 435 to 456               | <b>159</b>         | 457 to 485               | <b>185</b>         | ≥486                     |
| ≥192.1                         | <b>69</b>          | ≤259                     | <b>73</b>          | 260 to 293               | <b>90</b>          | 294 to 338               | <b>106</b>         | 339 to 382               | <b>120</b>         | 383 to 416               | <b>135</b>         | 417 to 431               | <b>144</b>         | 432 to 447               | <b>160</b>         | 448 to 489               | <b>185</b>         | ≥490                     |

medRxiv preprint doi: <https://doi.org/10.1101/2021.09.30.21264310>; this version posted October 1, 2021. The copyright holder for this preprint (which was not certified by peer review) is the author/funder, who has granted medRxiv a license to display the preprint in perpetuity. All rights reserved. No reuse allowed without permission.

| FEMALES           | HS1            |             | HS2                  |               | HS3                  |               | HS4                  |               | HS5                  |               | HS6                  |               | HS7                  |               | HS8                  |               | HS9                  |             |
|-------------------|----------------|-------------|----------------------|---------------|----------------------|---------------|----------------------|---------------|----------------------|---------------|----------------------|---------------|----------------------|---------------|----------------------|---------------|----------------------|-------------|
|                   | Length<br>(cm) | TBW<br>(kg) | MAC<br>range<br>(mm) | TBW<br>(kg)   | MAC<br>range<br>(mm) | TBW<br>(kg)   | MAC<br>range<br>(mm) | TBW<br>(kg)   | MAC<br>range<br>(mm) | TBW<br>(kg)   | MAC<br>range<br>(mm) | TBW<br>(kg)   | MAC<br>range<br>(mm) | TBW<br>(kg)   | MAC<br>range<br>(mm) | TBW<br>(kg)   | MAC<br>range<br>(mm) | TBW<br>(kg) |
| ≤144.0            | <b>34</b>      | ≤196        | <b>42</b>            | 197 to<br>238 | <b>47</b>            | 239 to<br>272 | <b>55</b>            | 273 to<br>301 | <b>62</b>            | 302 to<br>334 | <b>71</b>            | 335 to<br>370 | <b>80</b>            | 371 to<br>394 | <b>86</b>            | 395 to<br>472 | <b>108</b>           | ≥473        |
| 144.1 to<br>147.0 | <b>35</b>      | ≤217        | <b>44</b>            | 218 to<br>244 | <b>49</b>            | 245 to<br>270 | <b>56</b>            | 271 to<br>305 | <b>65</b>            | 306 to<br>342 | <b>74</b>            | 343 to<br>375 | <b>82</b>            | 376 to<br>394 | <b>88</b>            | 395 to<br>436 | <b>101</b>           | ≥437        |
| 147.1 to<br>150.0 | <b>39</b>      | ≤222        | <b>44</b>            | 223 to<br>244 | <b>53</b>            | 245 to<br>284 | <b>61</b>            | 285 to<br>324 | <b>72</b>            | 325 to<br>360 | <b>78</b>            | 361 to<br>384 | <b>88</b>            | 385 to<br>401 | <b>93</b>            | 402 to<br>442 | <b>104</b>           | ≥443        |
| 150.1 to<br>153.0 | <b>40</b>      | ≤215        | <b>47</b>            | 216 to<br>255 | <b>54</b>            | 256 to<br>287 | <b>63</b>            | 288 to<br>312 | <b>73</b>            | 313 to<br>349 | <b>80</b>            | 350 to<br>395 | <b>91</b>            | 396 to<br>419 | <b>107</b>           | 420 to<br>472 | <b>125</b>           | ≥473        |
| 153.1 to<br>156.0 | <b>42</b>      | ≤223        | <b>48</b>            | 224 to<br>253 | <b>56</b>            | 254 to<br>291 | <b>64</b>            | 292 to<br>321 | <b>74</b>            | 322 to<br>345 | <b>81</b>            | 346 to<br>405 | <b>98</b>            | 406 to<br>427 | <b>113</b>           | 428 to<br>473 | <b>127</b>           | ≥474        |
| 156.1 to<br>159.0 | <b>43</b>      | ≤219        | <b>50</b>            | 220 to<br>260 | <b>59</b>            | 261 to<br>297 | <b>69</b>            | 298 to<br>330 | <b>80</b>            | 331 to<br>366 | <b>91</b>            | 367 to<br>411 | <b>105</b>           | 412 to<br>433 | <b>116</b>           | 434 to<br>506 | <b>140</b>           | ≥507        |
| 159.1 to<br>162.0 | <b>45</b>      | ≤225        | <b>52</b>            | 226 to<br>258 | <b>61</b>            | 259 to<br>294 | <b>71</b>            | 295 to<br>334 | <b>85</b>            | 335 to<br>380 | <b>99</b>            | 381 to<br>418 | <b>110</b>           | 419 to<br>439 | <b>118</b>           | 440 to<br>479 | <b>136</b>           | ≥480        |
| 162.1 to<br>165.0 | <b>46</b>      | ≤226        | <b>53</b>            | 227 to<br>262 | <b>62</b>            | 263 to<br>294 | <b>73</b>            | 295 to<br>334 | <b>86</b>            | 335 to<br>380 | <b>99</b>            | 381 to<br>418 | <b>112</b>           | 419 to<br>450 | <b>123</b>           | 451 to<br>483 | <b>139</b>           | ≥484        |
| 165.1 to<br>168.0 | <b>47</b>      | ≤229        | <b>55</b>            | 230 to<br>260 | <b>64</b>            | 261 to<br>296 | <b>75</b>            | 297 to<br>335 | <b>89</b>            | 336 to<br>377 | <b>102</b>           | 378 to<br>415 | <b>115</b>           | 416 to<br>463 | <b>132</b>           | 464 to<br>509 | <b>160</b>           | ≥510        |
| 168.1 to<br>171.0 | <b>50</b>      | ≤229        | <b>58</b>            | 230 to<br>270 | <b>67</b>            | 271 to<br>296 | <b>77</b>            | 297 to<br>339 | <b>90</b>            | 340 to<br>382 | <b>107</b>           | 383 to<br>421 | <b>120</b>           | 422 to<br>457 | <b>136</b>           | 458 to<br>511 | <b>156</b>           | ≥512        |
| 171.1 to<br>174.0 | <b>52</b>      | ≤237        | <b>59</b>            | 238 to<br>269 | <b>69</b>            | 270 to<br>302 | <b>79</b>            | 303 to<br>337 | <b>91</b>            | 338 to<br>374 | <b>108</b>           | 375 to<br>425 | <b>125</b>           | 426 to<br>461 | <b>139</b>           | 462 to<br>497 | <b>165</b>           | ≥498        |
| 174.1 to<br>177.0 | <b>52</b>      | ≤235        | <b>61</b>            | 236 to<br>271 | <b>71</b>            | 272 to<br>303 | <b>82</b>            | 304 to<br>349 | <b>98</b>            | 350 to<br>379 | <b>110</b>           | 380 to<br>409 | <b>126</b>           | 410 to<br>462 | <b>135</b>           | 463 to<br>479 | <b>150</b>           | ≥480        |
| 177.1 to<br>180.0 | <b>57</b>      | ≤236        | <b>64</b>            | 237 to<br>270 | <b>74</b>            | 271 to<br>322 | <b>90</b>            | 323 to<br>349 | <b>99</b>            | 350 to<br>368 | <b>115</b>           | 369 to<br>418 | <b>125</b>           | 419 to<br>450 | <b>140</b>           | 451 to<br>480 | <b>155</b>           | ≥481        |
| ≥180.1            | <b>63</b>      | ≤256        | <b>72</b>            | 257 to<br>277 | <b>77</b>            | 278 to<br>312 | <b>85</b>            | 313 to<br>344 | <b>106</b>           | 345 to<br>378 | <b>125</b>           | 379 to<br>406 | <b>133</b>           | 407 to<br>434 | <b>142</b>           | 435 to<br>479 | <b>160</b>           | ≥480        |

Table 1 Final model for the male (upper panel) and female (lower panel) PAWPER XL-MAC adult tape. HS = habitus score, TBW = total body weight, MAC = mid-arm circumference.

|                                      | CALIBRATION DATASET |                 |                    | VALIDATION DATASET |                   |                 |
|--------------------------------------|---------------------|-----------------|--------------------|--------------------|-------------------|-----------------|
|                                      | All                 | Male            | Female             | All                | Male              | Female          |
| <b>N (%)</b>                         | 46340               | 22554           | 23786              | 11520              | 5724 (49.7)       | 5796 (50.3)     |
| <b>Age (years)</b>                   |                     |                 |                    |                    |                   |                 |
| <b>Median (UQ, LQ)</b>               | 43 (26, 61)         | 43 (26, 61)     | 42 (26, 61)        | 47 (30, 63)        | 48 (30, 63)       | 46 (30, 62)     |
| <b>&lt;20 years</b>                  | 14.8                | 15.7            | 13.9               | 9.8                | 10.2              | 9.5             |
| <b>20 to 29.9 years</b>              | 15.4                | 14.5            | 16.3               | 14.6               | 14.3              | 14.8            |
| <b>30 to 39.9 years</b>              | 14.8                | 14.3            | 15.2               | 14.7               | 14.3              | 15.1            |
| <b>40 to 49.9 years</b>              | 14.7                | 14.5            | 14.9               | 14.3               | 13.6              | 15              |
| <b>50 to 59.9 years</b>              | 12.5                | 12.8            | 12.2               | 15.2               | 14.9              | 15.4            |
| <b>60 to 69.9 years</b>              | 13.5                | 13.7            | 13.3               | 16.7               | 17.3              | 16.2            |
| <b>70 to 79.9 years</b>              | 8.9                 | 9.3             | 8.6                | 9.3                | 10                | 8.6             |
| <b>&gt;=80 years</b>                 | 5.4                 | 5.2             | 5.5                | 5.4                | 5.4               | 5.3             |
| <b>BMI (kgm<sup>-2</sup>)</b>        |                     |                 |                    |                    |                   |                 |
| <b>Median (UQ, LQ)</b>               | 27.1 (23.5, 31.6)   | 27 (23.7, 30.7) | 27.3 (23.3, 32.52) | 28.1 (24.1, 33)    | 27.8 (24.3, 32.1) | 28.5 (24, 33.9) |
| <b>&lt;18.5 kgm<sup>-2</sup></b>     | 2.4                 | 2.0             | 2.7                | 2.0                | 1.9               | 2.2             |
| <b>18.5 to 24.9 kgm<sup>-2</sup></b> | 32.7                | 32.3            | 33.0               | 27.7               | 27.3              | 28.1            |
| <b>25 to 29.9 kgm<sup>-2</sup></b>   | 32.4                | 36.9            | 28.1               | 31.0               | 34.8              | 27.6            |
| <b>30 to 34.9 kgm<sup>-2</sup></b>   | 18.8                | 18.7            | 18.9               | 20.8               | 21.2              | 20.5            |
| <b>35 to 39.9 kgm<sup>-2</sup></b>   | 8.2                 | 6.5             | 9.8                | 10.3               | 8.8               | 11.8            |
| <b>40 to 44.9 kgm<sup>-2</sup></b>   | 3.4                 | 2.5             | 4.3                | 4.7                | 3.8               | 5.5             |
| <b>45 to 49.9 kgm<sup>-2</sup></b>   | 1.3                 | 0.7             | 1.9                | 2.0                | 1.3               | 2.6             |
| <b>&gt;=50 kgm<sup>-2</sup></b>      | 0.9                 | 0.5             | 1.2                | 1.4                | 0.9               | 1.8             |
| <b>Ethnicity (%)</b>                 |                     |                 |                    |                    |                   |                 |
| <b>Mexican American</b>              | 12.6                | 12.7            | 12.4               | 16.0               | 15.5              | 16.4            |
| <b>Other Hispanic</b>                | 9.7                 | 8.9             | 10.4               | 11.1               | 10.0              | 12.1            |
| <b>Non-Hispanic</b>                  | 38.2                | 38.6            | 37.8               |                    |                   |                 |
| <b>White</b>                         |                     |                 |                    | 33.2               | 34.4              | 32.1            |

|                                    |                      |                      |                    |                    |                      |                     |
|------------------------------------|----------------------|----------------------|--------------------|--------------------|----------------------|---------------------|
| <b>Non-Hispanic Black</b>          | 23.6                 | 23.7                 | 23.6               | 22.2               | 21.8                 | 22.6                |
| <b>Non-Hispanic Asian</b>          | 12.7                 | 12.6                 | 12.8               | 12.9               | 13.2                 | 12.6                |
| <b>Other</b>                       | 3.2                  | 3.4                  | 3.0                | 4.6                | 5.1                  | 4.1                 |
| <b>Weight (kg) Median (UQ, LQ)</b> | 76.3 (64.5, 90.4)    | 81.7 (70.8, 94.8)    | 70.4 (59.8, 84.4)  | 77.9 (65.4, 93.1)  | 83.1 (71.7, 97.9)    | 72.1 (60.6, 87.025) |
| <b>Height (cm) Median (UQ, LQ)</b> | 167.1 (160.1, 174.6) | 174.4 (169.1, 179.6) | 160.9 (156, 165.7) | 166.1 (159, 173.7) | 173.5 (168.2, 178.6) | 159.8 (155, 164.6)  |

Table 2 Demographic characteristics of the calibration (developmental) and validation datasets. UQ = upper quartile, LQ = lower quartile, BMI = body mass index. The NHANES datasets are not fully representative of the US population, as some subgroups of age and race or ethnicity are oversampled. This dataset therefore contains a higher proportion of Non-Hispanic Black participants, Hispanic participants and Asian participants than the general population. However, the overall age distribution and BMI distribution are very similar to that of the general US population. Clearly there will also be regional differences in all of the subgroup compositions, which could affect the performance of a model derived from the overall pooled samples.

|                                      | CALIBRATION DATASET (N=46340) |         |         |         |         |         |         |         |         | VALIDATION DATASET (N=11520) |         |         |         |         |         |         |         |         |
|--------------------------------------|-------------------------------|---------|---------|---------|---------|---------|---------|---------|---------|------------------------------|---------|---------|---------|---------|---------|---------|---------|---------|
|                                      | All                           |         |         | Male    |         |         | Female  |         |         | All                          |         |         | Male    |         |         | Female  |         |         |
|                                      | MPE (%)                       | P10 (%) | P20 (%) | MPE (%) | P10 (%) | P20 (%) | MPE (%) | P10 (%) | P20 (%) | MPE (%)                      | P10 (%) | P20 (%) | MPE (%) | P10 (%) | P20 (%) | MPE (%) | P10 (%) | P20 (%) |
| <b>ALL</b>                           | -0.1                          | 72.6    | 96.8    | 0.0     | 72.7    | 96.9    | -0.2    | 72.5    | 96.7    | -1.2                         | 71.3    | 96      | -0.7    | 71.5    | 96.1    | -1.7    | 71.2    | 96      |
| <b>AGE</b>                           |                               |         |         |         |         |         |         |         |         |                              |         |         |         |         |         |         |         |         |
| <b>&lt;20 years</b>                  | 1.7                           | 77.0    | 98.2    | 2.9     | 76.3    | 97.8    | 0.4     | 77.8    | 98.5    | 1.3                          | 75.9    | 98.0    | 2.5     | 76.3    | 97.5    | 0.1     | 75.5    | 98.5    |
| <b>20 to 29.9 years</b>              | 1.0                           | 72.8    | 96.8    | 3.1     | 71.8    | 95.9    | -0.8    | 73.8    | 97.6    | 1.1                          | 72.5    | 96.2    | 3.5     | 70.0    | 94.4    | -1.0    | 74.9    | 97.9    |
| <b>30 to 39.9 years</b>              | 0.7                           | 72.1    | 96.4    | 1.8     | 72.0    | 96.1    | -0.4    | 72.2    | 96.6    | 0.1                          | 73.2    | 96.3    | 1.4     | 74.2    | 95.9    | -1.1    | 72.2    | 96.6    |
| <b>40 to 49.9 years</b>              | 0.4                           | 73.2    | 96.7    | 0.6     | 73.9    | 96.9    | 0.2     | 72.6    | 96.5    | -0.9                         | 72.7    | 96.1    | 0.1     | 72.3    | 95.7    | -1.7    | 73.0    | 96.4    |
| <b>50 to 59.9 years</b>              | -0.8                          | 73.0    | 96.8    | -1.2    | 74.7    | 97.9    | -0.3    | 71.3    | 95.7    | -1.8                         | 70.9    | 96.2    | -1.5    | 72.6    | 97.3    | -2.2    | 69.4    | 95.2    |
| <b>60 to 69.9 years</b>              | -1.2                          | 70.7    | 96.4    | -2.7    | 71.6    | 97.2    | 0.4     | 69.8    | 95.6    | -2.7                         | 69.3    | 94.6    | -2.9    | 72.0    | 96.2    | -2.4    | 66.7    | 93.0    |
| <b>70 to 79.9 years</b>              | -2.4                          | 69.4    | 96.2    | -4.6    | 69.9    | 96.9    | -0.2    | 68.9    | 95.5    | -3.9                         | 68.4    | 96.8    | -5.4    | 68.6    | 96.9    | -2.3    | 68.2    | 96.8    |
| <b>≥80 years</b>                     | -3.7                          | 68.1    | 96.5    | -6.2    | 65.6    | 96.1    | -1.5    | 70.4    | 96.9    | -5.6                         | 63.5    | 93.7    | -7.0    | 58.4    | 94.3    | -4.3    | 68.4    | 93.2    |
| <b>BMI</b>                           |                               |         |         |         |         |         |         |         |         |                              |         |         |         |         |         |         |         |         |
| <b>&lt;18.5 kgm<sup>-2</sup></b>     | 8.8                           | 53.8    | 95.9    | 9.8     | 51.1    | 94.4    | 8.2     | 55.6    | 96.9    | 9.0                          | 55.2    | 95.5    | 10.0    | 60.0    | 95.4    | 8.2     | 59.5    | 96.0    |
| <b>18.5 to 24.9 kgm<sup>-2</sup></b> | 3.7                           | 73.8    | 97.0    | 4.5     | 71.0    | 96.4    | 2.9     | 76.5    | 97.6    | 3.5                          | 75.0    | 97.3    | 4.3     | 71.3    | 96.2    | 2.7     | 78.4    | 98.2    |
| <b>25 to 29.9 kgm<sup>-2</sup></b>   | -0.2                          | 79.9    | 98.0    | -0.4    | 81.8    | 98.4    | -0.1    | 77.5    | 97.5    | -0.6                         | 79.8    | 97.6    | -0.5    | 80.2    | 97.4    | -0.7    | 79.3    | 97.9    |
| <b>30 to 34.9 kgm<sup>-2</sup></b>   | -3.1                          | 70.1    | 97.5    | -4.3    | 69.3    | 97.6    | -1.9    | 70.8    | 97.4    | -3.6                         | 71.1    | 96.7    | -3.8    | 70.2    | 96.9    | -3.4    | 72.0    | 96.5    |
| <b>35 to 39.9 kgm<sup>-2</sup></b>   | -5.3                          | 60.9    | 95.5    | -6.8    | 54.6    | 94.9    | -4.3    | 64.9    | 95.9    | -6.3                         | 58.9    | 95.4    | -6.1    | 59.9    | 95.0    | -6.4    | 58.1    | 95.8    |
| <b>40 to 44.9 kgm<sup>-2</sup></b>   | -6.4                          | 60.4    | 90.8    | -6.9    | 60.8    | 91.1    | -6.2    | 60.2    | 90.7    | -7.7                         | 54.6    | 90.9    | -7.8    | 57.9    | 90.0    | -7.6    | 52.5    | 91.6    |
| <b>45 to 49.9 kgm<sup>-2</sup></b>   | -8.7                          | 57.6    | 87.3    | -8.7    | 52.7    | 87.4    | -8.6    | 59.3    | 87.3    | -11.2                        | 41.0    | 81.1    | -9.8    | 38.0    | 87.3    | -11.8   | 42.4    | 78.1    |
| <b>≥50 kgm<sup>-2</sup></b>          | -12.3                         | 39.0    | 81.2    | -12.1   | 43.3    | 77.5    | -12.4   | 37.2    | 82.8    | -14.8                        | 28.6    | 80.1    | -11.3   | 39.6    | 83.3    | -16.4   | 23.6    | 77.0    |
| <b>ETHNICITY</b>                     |                               |         |         |         |         |         |         |         |         |                              |         |         |         |         |         |         |         |         |
| <b>Mexican American</b>              | -1.2                          | 74.3    | 97      | -1.3    | 75.1    | 98.1    | -1.1    | 73.4    | 95.9    | -2.5                         | 69.8    | 96.5    | -2.6    | 70.5    | 96.9    | -2.4    | 69.2    | 96.2    |
| <b>Other Hispanic</b>                | -0.4                          | 75.2    | 96.8    | 0.0     | 74.8    | 97.2    | -0.8    | 75.6    | 96.4    | -1.7                         | 75      | 96.6    | -1.2    | 76.3    | 95.6    | -2      | 74.0    | 97.3    |
| <b>Non-Hispanic White</b>            | -1.2                          | 71.9    | 96.4    | -1.4    | 71.3    | 96.4    | -1.0    | 72.5    | 96.4    | -2.3                         | 71      | 95.9    | -2.4    | 70.2    | 96.1    | -2.2    | 71.8    | 95.6    |
| <b>Non-Hispanic Black</b>            | 0.2                           | 72.1    | 96.5    | 1.8     | 71      | 96      | -1.3    | 73.3    | 97.1    | -0.5                         | 68.7    | 94.9    | 1.7     | 69.7    | 95.0    | -2.5    | 67.8    | 94.8    |
| <b>Non-Hispanic Asian</b>            | 2.8                           | 77.1    | 97.3    | 2.8     | 75.5    | 97.1    | 2.9     | 78.6    | 97.6    | 2.5                          | 74.9    | 97.4    | 2.3     | 75.5    | 97.5    | 2.7     | 74.2    | 97.3    |
| <b>Other</b>                         | 0.7                           | 67.9    | 95.1    | 1.1     | 67.9    | 96.9    | 0.2     | 68      | 93.1    | -1.5                         | 73.3    | 95.7    | 0       | 71.6    | 95.3    | -3.3    | 75.3    | 96.2    |

Table 3 Results of the weight estimation performance analyses for the calibration (developmental) and validation datasets overall and by subgroups of age, weight status and ethnicity. MPE = mean percentage error, P10 = percentage of weight estimations within 10% of actual weight, P20 = percentage of weight estimations within 20% of actual weight.



| Method                                    | Description and examples                                                                                                                                                                      | Accuracy                                                                                                                                                    | Comments                                                                                                                                                                                                                                                                                                                                                                                                  |
|-------------------------------------------|-----------------------------------------------------------------------------------------------------------------------------------------------------------------------------------------------|-------------------------------------------------------------------------------------------------------------------------------------------------------------|-----------------------------------------------------------------------------------------------------------------------------------------------------------------------------------------------------------------------------------------------------------------------------------------------------------------------------------------------------------------------------------------------------------|
| Patient estimation                        | The patient provides an estimate of their own weight if they are capable of doing so.                                                                                                         | The most accurate weight estimation method at the present time.<br>P10 range: 80 – 100%<br>P20 range: 90 – 100%                                             | Estimations may be substantially less accurate in overweight and obese patients. Critically ill or injured patients are not always able to provide a weight estimation. e.g., Hernandez-Barrera <i>et al</i> [1].                                                                                                                                                                                         |
| Family estimation                         | Family members provide an estimation of weight.                                                                                                                                               | This has not been well studied.<br>P10 range: 60 – 70%<br>P20 range: no data                                                                                | Few studies have formally evaluated this, although many papers regard this as an inaccurate method. Estimations are seldom better than guesses by healthcare providers. e.g., Breuer <i>et al</i> [2], Bailey <i>et al</i> [3].                                                                                                                                                                           |
| Healthcare provider guesses               | Doctors, nurses or paramedics guess the weight of the patient.                                                                                                                                | May not be accurate or reliable – very dependent on estimator and patient factors.<br>P10 range: 39 – 74%<br>P20 range: 73 – 94%                            | Large variation in accuracy between individual healthcare providers and frequent large errors of weight estimation. Many studies which report good accuracy have major flaws (generally low prevalence of obese patients and few patients of >100kg). e.g., Thomas <i>et al</i> [4].                                                                                                                      |
| Single variable anthropometric formulas   | Height and MAC have been used in single-variable formulas e.g., Kokong formula, MAC formula.                                                                                                  | Not accurate or reliable outside of original development studies.<br>P10 range: 42 – 60%<br>P20 range: 67 – 90%                                             | Although height has been used to predict IBW, it is biologically implausible to be able to predict total body weight accurately using a single variable. MAC fares better, but variable between populations. e.g., Kokong <i>et al</i> [5], Cattermole <i>et al</i> [6].                                                                                                                                  |
| Multiple variable anthropometric formulas | Height, tibial length, MAC, chest, hip, waist, thigh, or calf circumference have been used in various combinations in different formulas e.g., Chumlea, Rabito, Lorenz and Crandall formulas. | Some studies have shown excellent accuracy in initial studies, but inconsistent results on follow-up studies.<br>P10 range: 36 – 91%<br>P20 range: 58 – 95% | The quality of reporting in many of the studies evaluating these systems has been poor. While promising, especially the Lorenz formula, none of these formulas has yet proven to be consistently accurate. The difficulty of taking multiple measurements in patients not able to cooperate might be difficult, inaccurate, and time-consuming. e.g., Lorenz <i>et al</i> [7], Crandall <i>et al</i> [8]. |
| Computerised methods                      | Automatic biometric estimation of weight.                                                                                                                                                     | Good accuracy.<br>P10 range: 79 – 93%<br>P20 range: no data.                                                                                                | This technique has never been validated outside of early, development studies. e.g., Pfitzner <i>et al</i> [9], Velardo <i>et al</i> [10].                                                                                                                                                                                                                                                                |
| Paediatric weight estimation methods      | Mercy method (uses humeral length and MAC), PAWPER XL-MAC method (uses length and MAC).                                                                                                       | Very accurate in children; preliminary studies using the unmodified systems in adults has shown promise.<br>P10 range: 60 – 65%<br>P20 range: 85 – 92%      | These systems have been tested in paediatric emergencies. If they can be successfully adapted for use in adults, they may be very useful. e.g., Cattermole <i>et al</i> [11], Akinola <i>et al</i> [12].                                                                                                                                                                                                  |

Table 4 Total body weight estimation methods in adults. The accuracy ranges were obtained from different studies, or subgroup analyses within studies. P10 = percentage of weight estimations within 10% of actual weight, P20 = percentage of weight estimations within 20% of actual weight.

- [1] Hernandez-Barrera L, Trejo Valdivia B, Tellez-Rojo MM, Barquera S, Munoz-Manrique C. Validity assessment of self-reported weight and its correction process among Mexican adult women of reproductive age. *PLoS One*. 2020;15(7):e0235967. 10.1371/journal.pone.0235967
- [2] Breuer L, Nowe T, Huttner HB, Blinzler C, Kollmar R, Schellinger PD, et al. Weight approximation in stroke before thrombolysis: the WAIST-Study: a prospective observational "dose-finding" study. *Stroke*. 2010;41(12):2867-71. 10.1161/STROKEAHA.110.578062
- [3] Bailey B, Gaunt M, Grissinger M. Update on Medication Errors Associated with Incorrect Patient Weights. *Pa Patient Saf Advis*. 2016;13(2):50-57.
- [4] Thomas RA, Empey JA, Seth S, Crozier J. Guess the weight: the accuracy of estimated weight for surgical admissions - a comparison study. *Scott Med J*. 2019;64(2):56-61. 10.1177/0036933018805657
- [5] Kokong DD, Pam IC, Zoakah AI, Danbauchi SS, Mador ES, Mandong BM. Estimation of weight in adults from height: a novel option for a quick bedside technique. *Int J Emerg Med*. 2018;11(1):54. 10.1186/s12245-018-0212-9
- [6] Cattermole GN, Graham CA, Rainer TH. Mid-arm circumference can be used to estimate weight of adult and adolescent patients. *Emerg Med J*. 2017;34(4):231-236. 10.1136/emermed-2015-205623
- [7] Lorenz MW, Graf M, Henke C, Hermans M, Ziemann U, Sitzler M, et al. Anthropometric approximation of body weight in unresponsive stroke patients. *J Neurol Neurosurg Psychiatry*. 2007;78(12):1331-6. 10.1136/jnnp.2007.117150
- [8] Crandall CS, Gardner S, Braude DA. Estimation of total body weight in obese patients. *Air Med J*. 2009;28(3):139-145. 10.1016/j.amj.2009.02.002
- [9] Pfitzner C, May S, Nuchter A. Body Weight Estimation for Dose-Finding and Health Monitoring of Lying, Standing and Walking Patients Based on RGB-D Data. *Sensors (Basel)*. 2018;18(5). 10.3390/s18051311
- [10] Velardo C, Dugelay J, editors. Weight estimation from visual body appearance. 2010 Fourth IEEE International Conference on Biometrics: Theory, Applications and Systems (BTAS); 2010; Washington, DC.
- [11] Cattermole GN, Manirafasha A. Accuracy of weight estimation methods in adults, adolescents and children: a prospective study. *Emerg Med J*. 2020. 10.1136/emermed-2020-209581
- [12] Akinola O, Wells M, Parris P, Goldstein L. Are adults just big kids? Can the newer paediatric weight estimation systems be used in adults? *S Afr Med J*. 2021;111(2):166-170. 10.7196/SAMJ.2021.v111i2.15061

**Note to editor:** these references could be kept in the table legend, or added to the main reference list, according to your instructions.

### Step 1: Development of the model

The MAC cutpoints currently used by the paediatric PAWPER XL tape to define the seven habitus scores in each length-segment were used as a starting point for the adult tape. In the same way in which the habitus score categories were designed to predict BMI-for-age centiles in children, this model was intended to predict the BMI categories used by the CDC to define weight status (see details to the right). Cutpoint values for length-segments above 180 cm (the length of the paediatric PAWPER XL tape) were extrapolated from the existing data. These MAC ranges were derived to predict the habitus scores (and **total body weight**) in each length segment of the tape.

**HS1** BMI <18  
**HS2** BMI 18 to 19.9  
**HS3** BMI 20 to 24.9  
**HS4** BMI 25 to 29.9  
**HS5** BMI 30 to 34.9  
**HS6** BMI 35 to 39.9  
**HS7** BMI ≥40

### Step 2: Initial testing of the model

The preliminary model was then tested on the NHANES 2011-2012 and the 2013-2014 survey datasets. The datasets were downloaded and pooled. Data from children under the age of 16 was excluded as was incomplete data. The preliminary cutpoint data for each length-segment was coded into an electronic worksheet and the performance of the model was evaluated for each length-segment. The MAC cutpoints and predicted weights were adjusted for each tape segment until a satisfactory degree of weight estimation accuracy was achieved. It was apparent in this phase of model development that males and females needed to be separated to optimise weight estimation, and that additional habitus score categories needed to be added to allow better weight estimation in severely obese adults (see right).

**HS1** BMI <18  
**HS2** BMI 18 to 20.9  
**HS3** BMI 21 to 24.9  
**HS4** BMI 25 to 29.9  
**HS5** BMI 30 to 34.9  
**HS6** BMI 35 to 39.9  
**HS7** BMI 40 to 44.9  
**HS8** BMI 45 to 49.9  
**HS9** BMI ≥50

### Step 3: Secondary testing and calibration of the model

The secondary model was then tested on the pooled 1999-2000, 2001-2002, 2003-2004, 2005-2006, 2007-2008, 2009-2010, 2011-2012 and 2013-2014 NHANES survey datasets. As in Step 2, the MAC ranges and predicted weights were adjusted in each tape length-segment until a satisfactory degree of weight estimation accuracy was achieved (primary endpoint: P20>95%, secondary endpoint: P10>70%).

### Step 4: Validation of final model

The final model was then tested in two NHANES survey datasets that had not been used in the model design and development (the 2015-2016 and 2017-2018 surveys). Subgroup analyses by sex, age and race were included.

### Step 5: Future creation of the actual tape

The validated data will be used to provide the parameters to compose the tape. The tape (the 76 kg length segment is shown below) will be 2000mm long with 14 length-segments. The tape will be a single-use, double-sided paper tape with data for males on one side and females on the other. The beginning of the tape will include a printed scale with which to measure MAC. The MAC cutpoint ranges (in mm) which define the nine habitus scores and the corresponding predicted weights (in kg) can be seen below.

### Step 6: How the tape will be used

- Step 1** Measure the patient's recumbent length with the tape.  
**Step 2** Measure MAC on the non-dominant arm, and read habitus score and estimated total body weight directly off the tape at the measured length. Use the green side for males and the purple side for females.

| MAC Range (mm) | Estimated Weight (kg) |
|----------------|-----------------------|
| 1 ≤255         | 58                    |
| 2 256 to 286   | 65                    |
| 3 287 to 324   | 76                    |
| 4 325 to 360   | 88                    |
| 5 361 to 400   | 101                   |
| 6 401 to 429   | 117                   |
| 7 430 to 470   | 130                   |
| 8 471 to 497   | 152                   |
| 9 ≥498         | 160                   |

● Underweight   ● Normal weight   ● Overweight   ● Obese   ● Severely obese

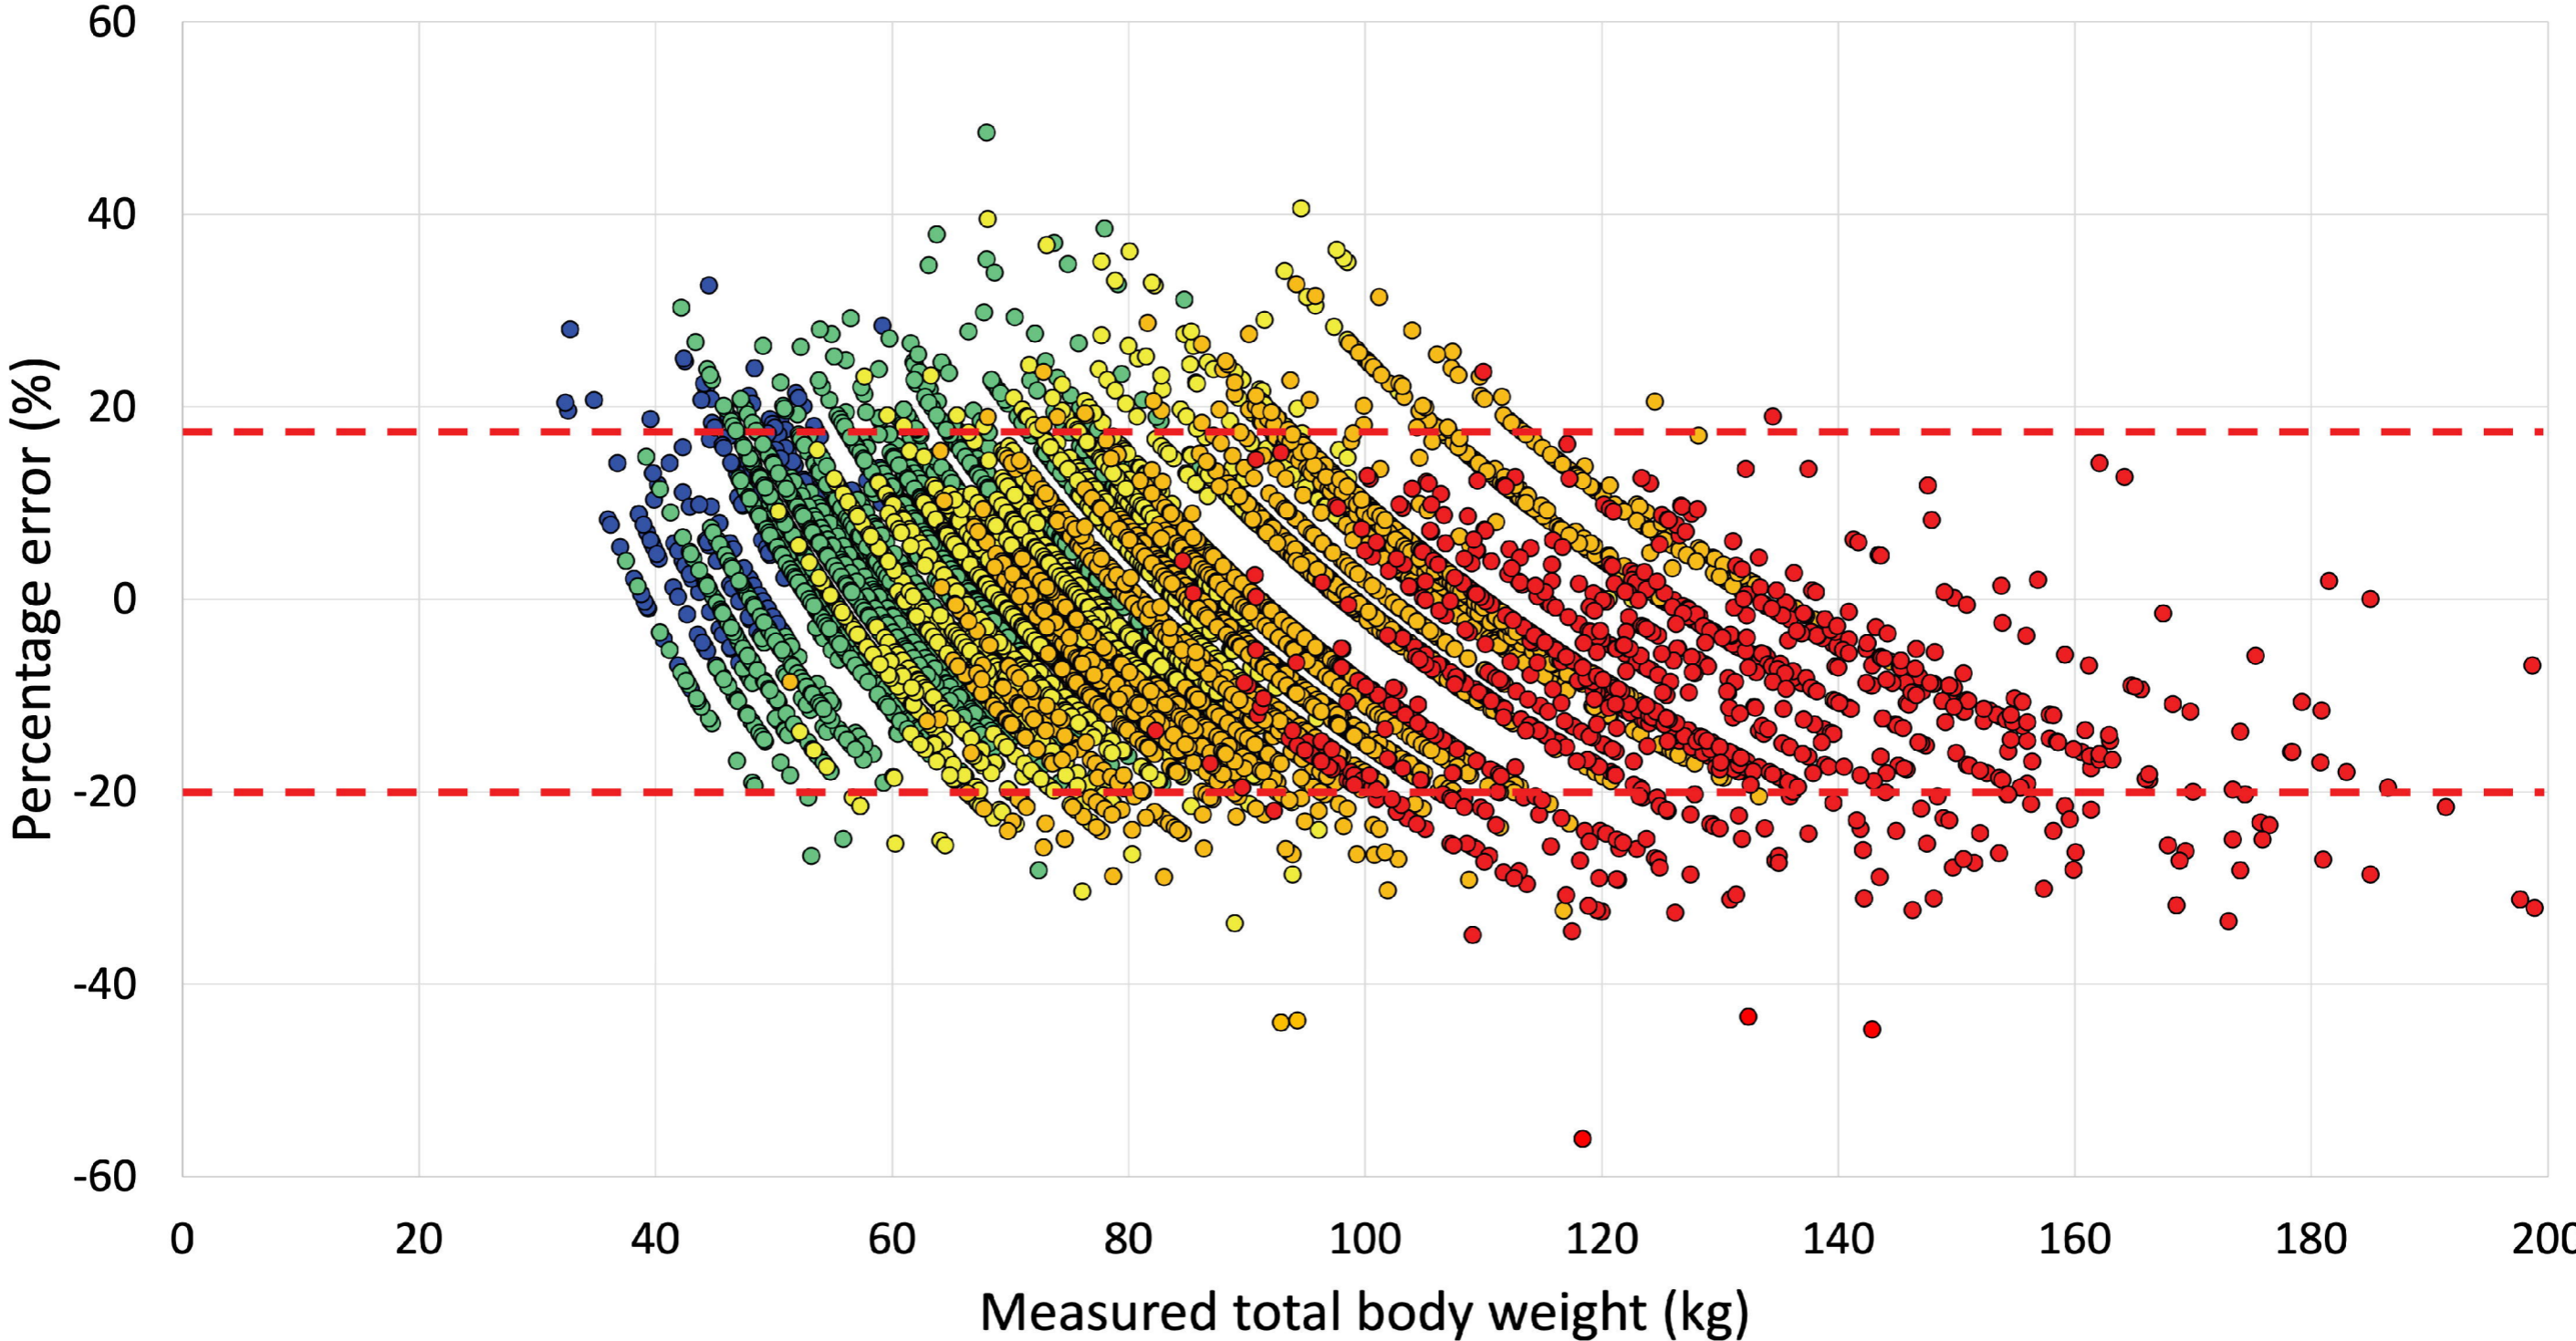

**Figure 1** The methodology followed in this study. MAC = mid-arm circumference, BMI = body mass index, CDC = Centers for Disease Control and Prevention, HS = habitus score, NHANES = national health and nutrition examination survey, P10 = percentage of weight estimations within 10% of actual weight, P20 = percentage of weight estimations within 20% of actual weight,

**Figure 2** Bland & Altman diagram by subgroups of weight status. The x-axis represents an individual's actual weight; the y-axis represents the percentage error of the difference between estimated and actual weight ( $100 \times [\text{estimated weight} - \text{actual weight}] / \text{actual weight}$ ). A negative value thus indicates an underestimation of weight. The red dashed lines represent the 95% limits of agreement of these residuals. The different colour markers represent individuals with different weight status, as shown in the key. The relationship between MAC and BMI was disrupted in patients with very high BMI, which lead to poorer weight predictions in these patients. A Pearson's correlation analysis between BMI and MAC showed an  $r^2$  of 0.72 (0.71, 0.73) for patients with a BMI < 40 kg.m<sup>-2</sup> and an  $r^2$  of 0.29 (0.27, 0.31) for patients with a BMI ≥ 40 kg.m<sup>-2</sup>.
